# Supplementary material for: Consumer Search and Purchase: An Empirical Investigation of Retargeting Based on Consumer Online Behaviors
Source: Atypon-hosted journal article supplement (doi:10.1287/mksc.2020.1255), 2021-01-12
Supplement: mksc.2020.1255.sm1.pdf [file mksc.2020.1255.sm1.pdf]

# Online Appendix for “Consumer Search and Purchase: An Empirical Investigation of Retargeting Based on Consumer Online Behaviors”

Zhenling Jiang, Tat Chan, Hai Che, Youwei Wang

## 1 Robustness with Correlation between Pre- and Post- Click Error Terms

In the main model, we assume that the pre- and post- click error terms  $e_{ij}$  (equation 2) and  $\epsilon_{ij}$  (equation 3) are independent. It is conceivable that the two sets of error terms may be either positively or negatively correlated. For example, a consumer who likes an option on the search research page more than other consumers (represented by a high  $e_{ij}$ ) will likely continue to appreciate it after click (represented by a high  $\epsilon_{ij}$ ). If so, the two error terms may be positively correlated. On the other hand, if an option attracts more clicks than usual (e.g. when it moves up in ranking) with a higher  $e_{ij}$ , consumers clicking into it will likely realize a lower than expected actual value from a lower  $\epsilon_{ij}$ , leading to a negative correlation. We assume that  $e_{ij}$  and  $\epsilon_{ij}$  are jointly distributed as bivariate normal distributions. To operationalize the correlation, we let

$$\epsilon_{ij} = \frac{\rho}{\sigma_e} \cdot e_{ij} + \sqrt{\sigma_e^2 - \rho^2} \cdot \eta_{ij}$$

where  $\eta_{ij} \sim N(0, 1)$ . Under this specification,  $\rho$  represents the correlation coefficient. Consumers have rational expectation of  $\rho$  and takes it into account in their search decisions.

While it is difficult to pin down the correlation, especially when the majority of consumers’ searches are short, we show that the estimation and counterfactual results are robust to possible correlations between the two error terms. To evaluate the impact, we re-estimate the model while fixing the correlation  $\rho$  to be -0.1 and 0.1 respectively to represent scenarios with possible negative and positive correlations. The estimation results are shown in Table 1. The estimates of key model parameters are very close to the main model.

We further conduct counterfactuals based on the estimation results. Tables 2 - 4 are analogous to Tables 6 – 8 in the main results. Importantly, all of the findings from counterfactuals remain unchanged. We still find that providing sellers the information on consumers’ search history will significantly improve the effectiveness of retargeting, and that seller recommendation is more effec-

Table 1: Estimation Results with Correlation  $\rho$ 

| <i>Utility parameters:</i>                                    | <i>Fix <math>\rho = 0.1</math></i>  |                                         | <i>Fix <math>\rho = -0.1</math></i> |                                         |
|---------------------------------------------------------------|-------------------------------------|-----------------------------------------|-------------------------------------|-----------------------------------------|
| Constant                                                      | -3.7791 (0.0064)                    |                                         | -3.4058 (0.0063)                    |                                         |
| Price                                                         | -0.0921 (0.0028)                    |                                         | -0.0935 (0.0029)                    |                                         |
| High star                                                     | 0.2231 (0.0047)                     |                                         | 0.2221 (0.0046)                     |                                         |
| Same location                                                 | 0.2173 (0.0041)                     |                                         | 0.2224 (0.0043)                     |                                         |
| Age (log)                                                     | 0.0219 (0.0018)                     |                                         | 0.0211 (0.0020)                     |                                         |
| Male                                                          | 0.0111 (0.0047)                     |                                         | 0.0140 (0.0048)                     |                                         |
| Missing demographics                                          | 0.0612 (0.0049)                     |                                         | 0.0612 (0.0046)                     |                                         |
| Number of past transactions (log)                             | 0.0061 (0.0005)                     |                                         | 0.0060 (0.0007)                     |                                         |
| Working hours                                                 | 0.0230 (0.0006)                     |                                         | 0.0229 (0.0008)                     |                                         |
| Weekend                                                       | -0.0046 (0.0016)                    |                                         | -0.0024 (0.0017)                    |                                         |
| <i>Search cost parameters:</i>                                |                                     |                                         |                                     |                                         |
| Mean of log search cost                                       | -5.4349 (0.0016)                    |                                         | -4.3958 (0.0021)                    |                                         |
| Std. dev. of log search cost                                  | 0.5716 (0.0010)                     |                                         | 0.5596 (0.0011)                     |                                         |
| <i>Estimated <math>\xi</math>'s and <math>\omega</math>'s</i> | <i>Pre-click <math>\xi_j</math></i> | <i>Post-click <math>\omega_j</math></i> | <i>Pre-click <math>\xi_j</math></i> | <i>Post-click <math>\omega_j</math></i> |
| Seller 1                                                      | 0.7755 (0.0031)                     | -0.4540 (0.0106)                        | 0.7800 (0.0032)                     | -0.5139 (0.0149)                        |
| Seller 2                                                      | 0.5154 (0.0036)                     | -0.1953 (0.0083)                        | 0.5202 (0.0035)                     | -0.2127 (0.0086)                        |
| Seller 3                                                      | 0.2045 (0.0039)                     | 0.0799 (0.0076)                         | 0.2069 (0.0039)                     | 0.0714 (0.0075)                         |
| Seller 4                                                      | 0.0697 (0.0042)                     | 0.2604 (0.0074)                         | 0.0719 (0.0042)                     | 0.2585 (0.0077)                         |
| Seller 5                                                      | 0.3721 (0.0047)                     | -0.3208 (0.0085)                        | 0.3710 (0.0048)                     | -0.3113 (0.0091)                        |
| Seller 6                                                      | -0.0265 (0.0054)                    | -0.5533 (0.0083)                        | -0.0269 (0.0053)                    | -0.5685 (0.0090)                        |
| Seller 7                                                      | 0.0409 (0.0055)                     | -0.0486 (0.0081)                        | 0.0368 (0.0055)                     | -0.0297 (0.0077)                        |
| Seller 8                                                      | 0.1247 (0.0055)                     | 0.1939 (0.0073)                         | 0.1240 (0.0051)                     | 0.1949 (0.0074)                         |
| Seller 9                                                      | -0.1979 (0.0061)                    | -0.0105 (0.0079)                        | -0.2011 (0.0060)                    | 0.0173 (0.0076)                         |
| Seller 10                                                     | -0.2130 (0.0060)                    | 0.1921 (0.0078)                         | -0.2169 (0.0063)                    | 0.1962 (0.0078)                         |
| Seller 11                                                     | -0.1926 (0.0062)                    | -0.2479 (0.0076)                        | -0.1874 (0.0061)                    | -0.2397 (0.0072)                        |
| Seller 12                                                     | -0.0886 (0.0068)                    | 0.2544 (0.0075)                         | -0.0914 (0.0071)                    | 0.2549 (0.0074)                         |
| Seller 13                                                     | 0.0023 (0.0071)                     | 0.2689 (0.0075)                         | 0.0074 (0.0071)                     | 0.2656 (0.0083)                         |
| Seller 14                                                     | -0.2482 (0.0063)                    | 0.4817 (0.0080)                         | -0.2489 (0.0062)                    | 0.4821 (0.0076)                         |
| Seller 15                                                     | -0.1220 (0.0073)                    | 0.0774 (0.0082)                         | -0.1226 (0.0074)                    | 0.0237 (0.0087)                         |
| Seller 16                                                     | -0.1231 (0.0074)                    | 0.0870 (0.0082)                         | -0.1256 (0.0072)                    | 0.1537 (0.0078)                         |
| Seller 17                                                     | -0.3459 (0.0171)                    | 0.1400 (0.0089)                         | -0.3380 (0.0175)                    | 0.1504 (0.0081)                         |
| Seller 18                                                     | -0.1057 (0.0102)                    | 0.1983 (0.0091)                         | -0.1041 (0.0140)                    | 0.1989 (0.0081)                         |
| Seller 19                                                     | -0.1005 (0.0197)                    | 0.1103 (0.0082)                         | -0.0956 (0.0220)                    | 0.0974 (0.0079)                         |
| Seller 20                                                     | -0.3410 (0.0174)                    | -0.5143 (0.0369)                        | -0.3597 (0.0176)                    | -0.4892 (0.0373)                        |
| Observations                                                  | 104,819                             |                                         | 104,819                             |                                         |
| LL                                                            | -288,006.6                          |                                         | -287960.9                           |                                         |
| AIC                                                           | 576,109.2                           |                                         | 576017.8                            |                                         |
| BIC                                                           | 576,568.1                           |                                         | 576476.7                            |                                         |

tive than offering coupons as a retargeting strategy. These results suggest that our main findings are robust to possible correlation between the pre- and post-click error terms.

Table 2: Results from Random Retargeting with Coupons and the Heterogeneity

|                                                                  | <i>Fix <math>\rho = 0.1</math></i> |                    | <i>Fix <math>\rho = -0.1</math></i> |                    |
|------------------------------------------------------------------|------------------------------------|--------------------|-------------------------------------|--------------------|
|                                                                  | Conversion rate of retargeting     | Expected value (¥) | Conversion rate of retargeting      | Expected value (¥) |
| Random retargeting for all consumers w/o purchase                | 0.0077%                            | 0.0083             | 0.0071%                             | 0.0077             |
| <i>Heterogeneity Based on Observed Consumer Characteristics:</i> |                                    |                    |                                     |                    |
| Past number of transactions                                      |                                    |                    |                                     |                    |
| 0 – 30                                                           | 0.0069%                            | 0.0074             | 0.0063%                             | 0.0067             |
| 31 – 150                                                         | 0.0075%                            | 0.0081             | 0.0070%                             | 0.0074             |
| 151 or above                                                     | 0.0084%                            | 0.0091             | 0.0079%                             | 0.0084             |
| Gender                                                           |                                    |                    |                                     |                    |
| Male                                                             | 0.0083%                            | 0.0090             | 0.0078%                             | 0.0083             |
| Female                                                           | 0.0080%                            | 0.0086             | 0.0074%                             | 0.0080             |
| Age                                                              |                                    |                    |                                     |                    |
| 18 – 25                                                          | 0.0078%                            | 0.0085             | 0.0073%                             | 0.0078             |
| 26 – 30                                                          | 0.0083%                            | 0.0090             | 0.0078%                             | 0.0084             |
| 31 or above                                                      | 0.0085%                            | 0.0092             | 0.0080%                             | 0.0086             |
| Time of Visit                                                    |                                    |                    |                                     |                    |
| Working hours                                                    | 0.0080%                            | 0.0086             | 0.0074%                             | 0.0080             |
| Non-working hours                                                | 0.0072%                            | 0.0078             | 0.0067%                             | 0.0072             |
| Day of Visit                                                     |                                    |                    |                                     |                    |
| Weekday                                                          | 0.0078%                            | 0.0084             | 0.0072%                             | 0.0077             |
| Weekend                                                          | 0.0075%                            | 0.0081             | 0.0070%                             | 0.0076             |
| <i>Heterogeneity Based on Consumer Search Behaviors:</i>         |                                    |                    |                                     |                    |
| Own or Competitors' Customers                                    |                                    |                    |                                     |                    |
| Send to own customers                                            | 0.0965%                            | 0.1068             | 0.0090%                             | 0.0958             |
| Send to competitors' customers                                   | 0.0021%                            | 0.0023             | 0.0022%                             | 0.0023             |
| Search Intensity                                                 |                                    |                    |                                     |                    |
| Searched one seller                                              | 0.0055%                            | 0.0059             | 0.0051%                             | 0.0054             |
| Searched two sellers                                             | 0.0234%                            | 0.0254             | 0.0222%                             | 0.0240             |
| Searched three or more sellers                                   | 0.0318%                            | 0.0347             | 0.0300%                             | 0.0325             |
| Order of Search (among own customers)                            |                                    |                    |                                     |                    |
| Searched two sellers:                                            |                                    |                    |                                     |                    |
| First searched seller                                            | 0.2277%                            | 0.2446             | 0.1986%                             | 0.2122             |
| Second searched seller                                           | 0.1496%                            | 0.1632             | 0.1470%                             | 0.1599             |
| Searched three sellers:                                          |                                    |                    |                                     |                    |
| First searched seller                                            | 0.2412%                            | 0.2590             | 0.2009%                             | 0.2149             |
| Second searched seller                                           | 0.1611%                            | 0.1756             | 0.1494%                             | 0.1619             |
| Last searched seller                                             | 0.1235%                            | 0.1352             | 0.1198%                             | 0.1307             |
| <i>Heterogeneity Based on Seller Characteristics:</i>            |                                    |                    |                                     |                    |
| Sales Volume                                                     |                                    |                    |                                     |                    |
| High                                                             | 0.0134%                            | 0.0144             | 0.0129%                             | 0.0138             |
| Low                                                              | 0.0020%                            | 0.0022             | 0.0014%                             | 0.0015             |
| Click Rate                                                       |                                    |                    |                                     |                    |
| High                                                             | 0.0131%                            | 0.0139             | 0.0127%                             | 0.0134             |
| Low                                                              | 0.0023%                            | 0.0027             | 0.0016%                             | 0.0019             |
| Conversion Rate                                                  |                                    |                    |                                     |                    |
| High                                                             | 0.0095%                            | 0.0104             | 0.0086%                             | 0.0094             |
| Low                                                              | 0.0059%                            | 0.0064             | 0.0057%                             | 0.0059             |

Table 3: Counterfactual – Retargeting with Coupons with Correlation  $\rho$ 

|                                     | Random Retargeting | Retargeting by the Last Click | Retargeting through Second-Priced Bids: No Consumer Information | Retargeting through Second-Priced Bids: with Consumer Search History |
|-------------------------------------|--------------------|-------------------------------|-----------------------------------------------------------------|----------------------------------------------------------------------|
| <i>Fix <math>\rho = 0.1</math></i>  |                    |                               |                                                                 |                                                                      |
| Conversion rate (%)                 | 0.008              | 0.082                         | 0.038                                                           | 0.096                                                                |
| Consumer welfare (¥)                | 550                | 4,841                         | 2,266                                                           | 5,697                                                                |
| Seller profit (¥)                   | -                  | -                             | 799                                                             | 9,618                                                                |
| Platform profit (¥)                 | -                  | -                             | 15,593                                                          | 33,230                                                               |
| Total profit (¥)                    | 3,507              | 36,630                        | 16,392                                                          | 42,848                                                               |
| <i>Fix <math>\rho = -0.1</math></i> |                    |                               |                                                                 |                                                                      |
| Conversion rate (%)                 | 0.007              | 0.074                         | 0.039                                                           | 0.084                                                                |
| Consumer welfare (¥)                | 535                | 4,395                         | 2,327                                                           | 4,955                                                                |
| Seller profit (¥)                   | -                  | -                             | 811                                                             | 8,120                                                                |
| Platform profit (¥)                 | -                  | -                             | 16,060                                                          | 29,269                                                               |
| Total profit (¥)                    | 3,247              | 33,166                        | 16,871                                                          | 37,389                                                               |

Table 4: Counterfactual – Retargeting by Seller Recommendation with Correlation  $\rho$ 

|                                     | Random Retargeting | Retargeting through Second-Priced Bids: No Consumer Information | Retargeting through Second-Priced Bids: with Consumer Search History |
|-------------------------------------|--------------------|-----------------------------------------------------------------|----------------------------------------------------------------------|
| <i>Fix <math>\rho = 0.1</math></i>  |                    |                                                                 |                                                                      |
| Conversion rate (%)                 | 0.107              | 0.254                                                           | 0.258                                                                |
| Consumer welfare (¥)                | 29,153             | 72,864                                                          | 73,562                                                               |
| Seller profit (¥)                   | -                  | 9,432                                                           | 8,112                                                                |
| Platform profit (¥)                 | -                  | 154,668                                                         | 157,328                                                              |
| Total profit (¥)                    | 60,854             | 164,100                                                         | 165,440                                                              |
| <i>Fix <math>\rho = -0.1</math></i> |                    |                                                                 |                                                                      |
| Conversion rate (%)                 | 0.125              | 0.372                                                           | 0.389                                                                |
| Consumer welfare (¥)                | 34,259             | 103,557                                                         | 108,192                                                              |
| Seller profit (¥)                   | -                  | 9,212                                                           | 14,166                                                               |
| Platform profit (¥)                 | -                  | 191,278                                                         | 197,487                                                              |
| Total profit (¥)                    | 71,916             | 200,490                                                         | 211,653                                                              |

## 2 Estimation with Three Price and Star Level Groups

In the main estimation results, we estimate the price coefficient by using the variation in clicking and purchase patterns between high price (average price ¥2,334) group and low price group (average price ¥2,102). Similarly, the coefficient for star level is also estimated using the variation between high star (average 12.91) group and low star group (average 9.12). In this appendix, we present

results when breaking the sellers into three price and seller star groups. Table 5 shows the average price and star level for each seller, as well as the categorization of the price and star level groups.

We run the estimation with the three price level groups and three star level groups as a robustness check. With three price groups, the average price is ¥2,412 for the high price group, ¥2,206 for the medium price group and ¥2,092 for the low price group. We directly estimate the price coefficient  $\beta_p$  for ¥100. Using the low price group as a baseline, the perceived utility difference is  $1.14 \cdot \beta_p$  for sellers in the medium price group, and  $3.2 \cdot \beta_p$  for sellers in the high price group. With three star level groups, the average star level is 13.67 for the high star group, 11.52 for the medium star group and 7.68 for the low star group. We estimate the star level coefficient  $\beta_s$  for 1 star level difference. Using the low star level group as a baseline, the perceived utility difference is  $3.84 \cdot \beta_s$  for sellers in the medium star group, and  $5.99 \cdot \beta_s$  for sellers in the high star group.

The estimated price coefficient for ¥100 is -0.051. This is close to the results in the main analysis with -0.040 for ¥100 (-0.0932 with ¥232 average price difference between high and low price groups). The estimated star coefficient for 1 star level difference is 0.045, which is close to the main analysis with 0.059 for 1 star level difference (0.2234 for 3.79 average star level difference between high and low star groups). These results show the robustness of inferring the coefficients for price and star level using the variation across sellers.

Table 5: Price and Star Level for Each Seller

| <i>Seller:</i> | Price  | Two Price<br>Groups | Three Price<br>Groups | <i>Seller:</i> | Star Level | Two Star<br>Level Groups | Three Star<br>Level Groups |
|----------------|--------|---------------------|-----------------------|----------------|------------|--------------------------|----------------------------|
| 9              | ¥2,082 | L                   | L                     | 19             | 6.0        | L                        | L                          |
| 15             | ¥2,082 | L                   | L                     | 16             | 7.0        | L                        | L                          |
| 4              | ¥2,082 | L                   | L                     | 7              | 7.4        | L                        | L                          |
| 10             | ¥2,089 | L                   | L                     | 13             | 9.0        | L                        | L                          |
| 16             | ¥2,102 | L                   | L                     | 5              | 9.0        | L                        | L                          |
| 1              | ¥2,103 | L                   | L                     | 12             | 10.7       | L                        | M                          |
| 12             | ¥2,105 | L                   | L                     | 15             | 11.0       | L                        | M                          |
| 7              | ¥2,123 | L                   | M                     | 8              | 11.0       | L                        | M                          |
| 17             | ¥2,126 | L                   | M                     | 18             | 11.0       | L                        | M                          |
| 3              | ¥2,127 | L                   | M                     | 20             | 12.0       | H                        | M                          |
| 20             | ¥2,183 | H                   | M                     | 17             | 12.0       | H                        | M                          |
| 11             | ¥2,202 | H                   | M                     | 9              | 12.0       | H                        | M                          |
| 19             | ¥2,290 | H                   | M                     | 14             | 12.0       | H                        | M                          |
| 2              | ¥2,292 | H                   | M                     | 3              | 12.0       | H                        | M                          |
| 8              | ¥2,308 | H                   | M                     | 1              | 13.0       | H                        | H                          |
| 5              | ¥2,339 | H                   | H                     | 6              | 13.0       | H                        | H                          |
| 6              | ¥2,359 | H                   | H                     | 11             | 13.0       | H                        | H                          |
| 13             | ¥2,376 | H                   | H                     | 10             | 13.0       | H                        | H                          |
| 18             | ¥2,489 | H                   | H                     | 2              | 15.0       | H                        | H                          |
| 14             | ¥2,499 | H                   | H                     | 4              | 15.0       | H                        | H                          |

### 3 Robustness Analysis with Another Product

The main analysis is based on one product with the largest number of searches and purchases. In this appendix, we show robustness of the analysis using the iPad 4 16G WiFi product, which has the second largest number of searches and purchases in our data.

We show that the reduced-form data patterns in the main analysis continue to hold. We observe a U-shaped relationship between the order of search and conversion rate for consumers with search size 3 or 4 (Figure 1), which is consistent with an optimal sequential search model.

Figure 1: Order of Search and Conversion Rate

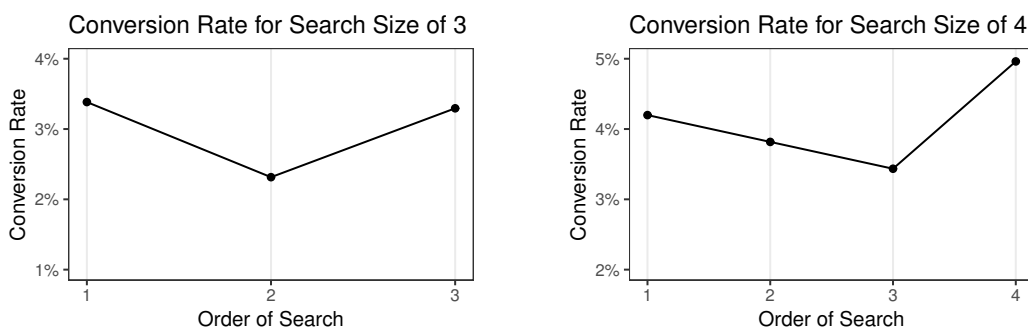

For the top 20 sellers with the iPad 4 16G WiFi product, similarly, we see a large variation in click rates and conversion rates across the sellers (Figure 2).

Figure 2: Click Rates and Conversion Rates across Sellers

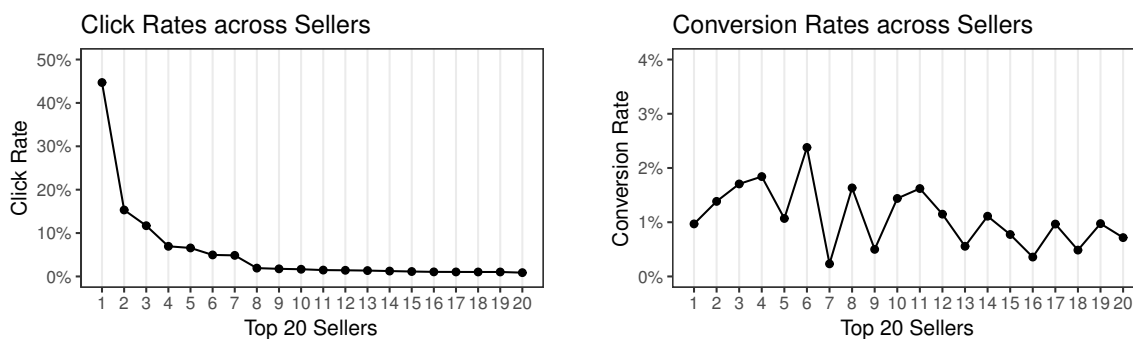

In addition, we show estimation results with the iPad 4 16G WiFi. Table 6 is analogous to the estimation results using the main product category (iPad Mini 16G WiFi) reported in Table 5. The estimates are very close between the two products.

Table 6: Estimation Results for iPad 4

| <i>Utility parameters:</i>                                    | Estimates (std. err.) |                              |
|---------------------------------------------------------------|-----------------------|------------------------------|
| Constant                                                      | -3.5378               | (0.0075)                     |
| Price                                                         | -0.1638               | (0.0050)                     |
| High star                                                     | 0.2911                | (0.0064)                     |
| Same location                                                 | 0.2413                | (0.0051)                     |
| Age (log)                                                     | 0.0123                | (0.0026)                     |
| Male                                                          | 0.0263                | (0.0058)                     |
| Missing demographics                                          | 0.0395                | (0.0057)                     |
| Number of past transactions (log)                             | 0.0024                | (0.0009)                     |
| Working hours                                                 | 0.0033                | (0.0011)                     |
| Weekend                                                       | -0.0126               | (0.0019)                     |
| <i>Search cost parameters:</i>                                |                       |                              |
| Mean of log search cost                                       | -4.7622               | (0.0023)                     |
| Std. dev. of log search cost                                  | 0.6527                | (0.0013)                     |
| <i>Estimated <math>\xi</math>'s and <math>\omega</math>'s</i> |                       |                              |
| Seller 1                                                      | 0.6550                | (0.0030)    -0.2744 (0.0082) |
| Seller 2                                                      | 0.2673                | (0.0038)    0.0003 (0.0073)  |
| Seller 3                                                      | 0.1568                | (0.0042)    0.1586 (0.0069)  |
| Seller 4                                                      | -0.0014               | (0.0044)    0.2418 (0.0072)  |
| Seller 5                                                      | 0.0368                | (0.0048)    0.0230 (0.0073)  |
| Seller 6                                                      | -0.0387               | (0.0057)    0.3394 (0.0071)  |
| Seller 7                                                      | 0.3613                | (0.0059)    -0.4544 (0.0073) |
| Seller 8                                                      | 0.2253                | (0.0065)    0.2409 (0.0075)  |
| Seller 9                                                      | -0.2249               | (0.0079)    -0.0535 (0.0077) |
| Seller 10                                                     | 0.0450                | (0.0081)    0.2915 (0.0077)  |
| Seller 11                                                     | -0.3133               | (0.0071)    0.2405 (0.0078)  |
| Seller 12                                                     | -0.1128               | (0.0081)    0.1500 (0.0076)  |
| Seller 13                                                     | 0.1631                | (0.0079)    -0.2057 (0.0080) |
| Seller 14                                                     | -0.1761               | (0.0074)    0.1374 (0.0081)  |
| Seller 15                                                     | -0.2880               | (0.0103)    0.0699 (0.0074)  |
| Seller 16                                                     | -0.1806               | (0.0079)    -0.2017 (0.0080) |
| Seller 17                                                     | -0.4104               | (0.0211)    0.1665 (0.0092)  |
| Seller 18                                                     | -0.0275               | (0.0094)    -0.1260 (0.0084) |
| Seller 19                                                     | -0.1776               | (0.0225)    0.0721 (0.0082)  |
| Seller 20                                                     | 0.0406                | (0.0213)    -0.8164 (0.0341) |
| Observations                                                  | 79,689                |                              |
| LL                                                            | -225,569.9            |                              |
| AIC                                                           | 451,235.8             |                              |
| BIC                                                           | 451,681.5             |                              |
